# Supplementary material for: The role of electrostatic potential in the translocation of triangulene across membranes
Source: Royal Society of Chemistry journal article supplement (doi:10.1039/d3ra03259k), 2023-01-01
Supplement: d3ra03259k1.pdf [file d3ra03259k1.pdf]

## Supporting Information Available

The following files are available free of charge.

### S1: Atom Charge

| Atom Index | Charge(e) |          |        |
|------------|-----------|----------|--------|
|            | ESP       | Inside-0 | ALL-0  |
| 1 CA       | -0.120388 | -0.1150  | 0.0000 |
| 2 CA       | -0.202281 | -0.1150  | 0.0000 |
| 3 CB       | 0.153217  | 0.0000   | 0.0000 |
| 4 CA       | -0.202540 | -0.1150  | 0.0000 |
| 5 CB       | 0.152213  | 0.0000   | 0.0000 |
| 6 CA       | -0.320895 | -0.1150  | 0.0000 |
| 7 CB       | 0.157178  | 0.0000   | 0.0000 |
| 8 CB       | 0.031381  | 0.0000   | 0.0000 |
| 9 CB       | -0.109882 | 0.0000   | 0.0000 |
| 10 CA      | -0.318303 | -0.1150  | 0.0000 |
| 11 CB      | 0.155104  | 0.0000   | 0.0000 |
| 12 CA      | -0.206469 | -0.1150  | 0.0000 |
| 13 CA      | -0.119006 | -0.1150  | 0.0000 |
| 14 CB      | 0.028426  | 0.0000   | 0.0000 |
| 15 CB      | 0.157728  | 0.0000   | 0.0000 |
| 16 CB      | 0.027480  | 0.0000   | 0.0000 |

|       |           |         |        |
|-------|-----------|---------|--------|
| 17 CB | 0.159866  | 0.0000  | 0.0000 |
| 18 CA | -0.205793 | -0.1150 | 0.0000 |
| 19 CA | -0.117559 | -0.1150 | 0.0000 |
| 20 CA | -0.204591 | -0.1150 | 0.0000 |
| 21 CA | -0.324208 | -0.1150 | 0.0000 |
| 22 CA | -0.207138 | -0.1150 | 0.0000 |
| 23 HA | 0.128901  | 0.1150  | 0.0000 |
| 24 HA | 0.132498  | 0.1150  | 0.0000 |
| 25 HA | 0.150227  | 0.1150  | 0.0000 |
| 26 HA | 0.133156  | 0.1150  | 0.0000 |
| 27 HA | 0.128678  | 0.1150  | 0.0000 |
| 28 HA | 0.133505  | 0.1150  | 0.0000 |
| 29 HA | 0.151059  | 0.1150  | 0.0000 |
| 30 HA | 0.132853  | 0.1150  | 0.0000 |
| 31 HA | 0.128982  | 0.1150  | 0.0000 |
| 32 HA | 0.133326  | 0.1150  | 0.0000 |
| 33 HA | 0.150894  | 0.1150  | 0.0000 |
| 34 HA | 0.132381  | 0.1150  | 0.0000 |

S2: System setup Information

| System setup Information | Parameters                                                          |
|--------------------------|---------------------------------------------------------------------|
| Box                      | $7.64 \text{ (nm)} \times 7.64 \text{ (nm)} \times 10 \text{ (nm)}$ |
| Triangulene              | 1(#)                                                                |
| POPC                     | 188(#)                                                              |
| SOL(water)               | 11854(#)                                                            |
| Ions(NaCl)               | 0.15(mol/L)                                                         |
| Na <sup>+</sup>          | 44(#)                                                               |
| Cl <sup>-</sup>          | 44(#)                                                               |
| Forcefield               | CHARMM36                                                            |
| Water                    | Tip 3p model                                                        |
| ESP Simulation Time      | $5 \times 100 \text{ (ns)}$                                         |
| Inside-0 Simulation Time | $5 \times 100 \text{ (ns)}$                                         |
| All-0 Simulation Time    | $5 \times 100 \text{ (ns)}$                                         |
